# Supplementary material
Source: PubMed Central journal article supplement (PMC3563939)

**A**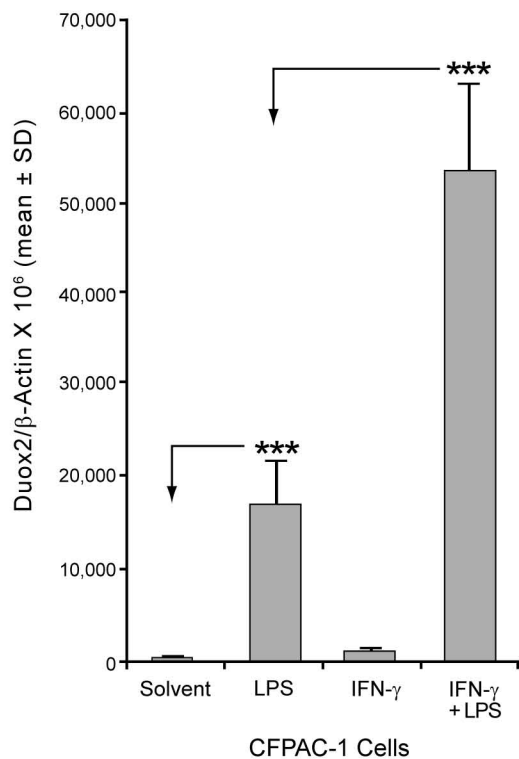**B**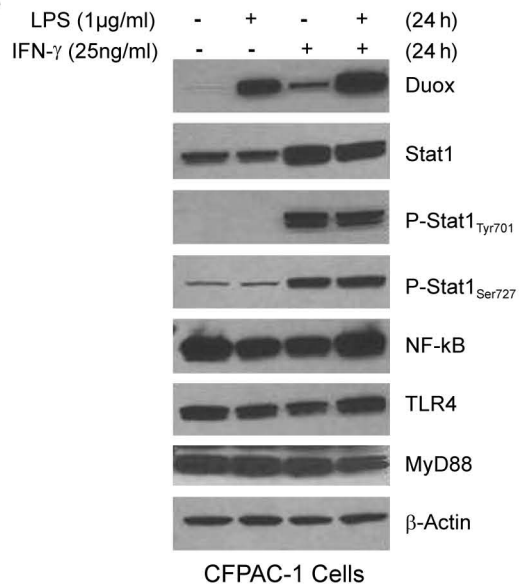**C**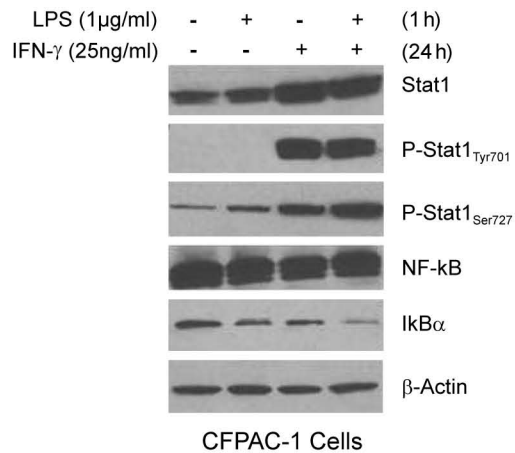

*Supplemental Figure 2*

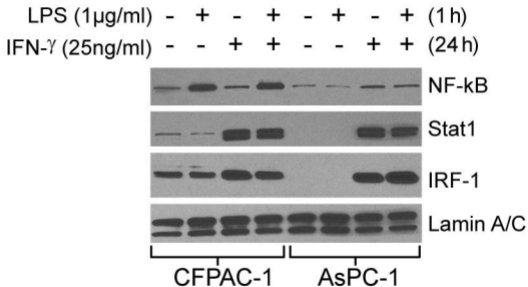

Supplemental Figure 3

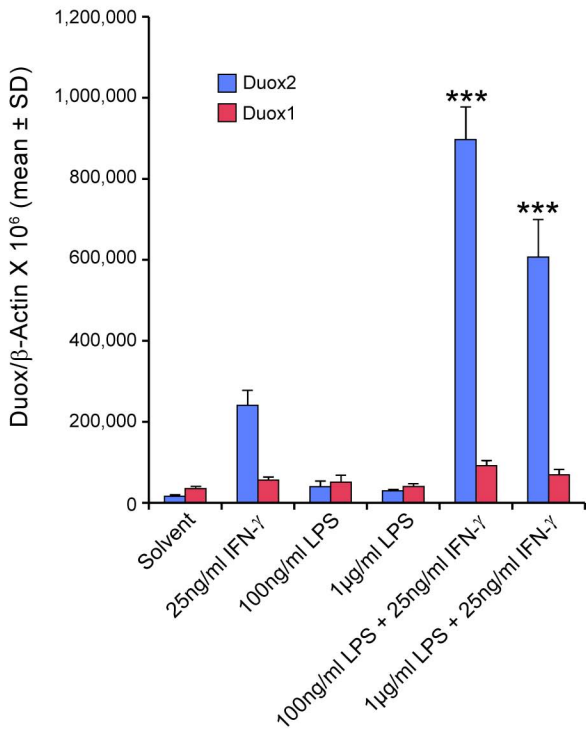

Supplement: NIHMS429401-supplement-2.pdf [file NIHMS429401-supplement-2.pdf]
